# Supplementary material for: Enhanced nitrate reduction via the Ag–Cu–P catalyst for sustainable ammonia generation under ambient conditions
Source: Royal Society of Chemistry journal article supplement (doi:10.1039/d3gc03859a), 2023-12-12
Supplement: d3gc03859a1.pdf [file d3gc03859a1.pdf]

## Supporting Information

### Enhanced Nitrate-to-Ammonia Conversion through Ag-Cu-P Catalyst for Sustainable Ammonia Generation under Ambient Conditions

Xinwei Wen<sup>a</sup>, Yue Zhao<sup>a</sup>, Puyang Fan<sup>a</sup>, Jiajie Wu<sup>a</sup>, Kai Xiong<sup>c</sup>, Chang Liu<sup>a</sup>, Qing Qu<sup>a\*</sup> and Lei Li<sup>b\*</sup>

<sup>a</sup> School of Chemical Science and Technology, Yunnan University, Kunming 650091, China

<sup>b</sup> State Key Laboratory for Conservation and Utilization of Bio-Resources in Yunnan, Yunnan University, Kunming 650091, China

<sup>c</sup> School of Materials and Energy, Yunnan University, Kunming 650091, China

\*Corresponding author: Qing Qu; quqing@ynu.edu.cn

Supporting Figures and Tables

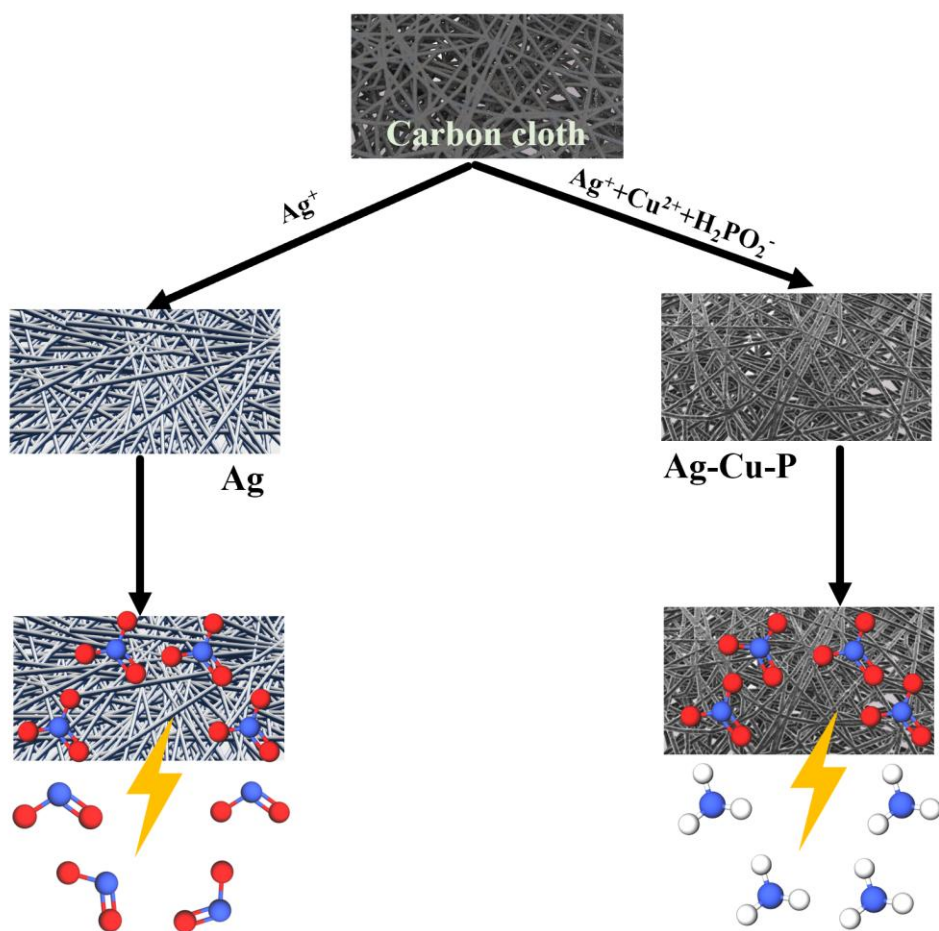

**Figure S1.** The synthetic route of Ag/CP and Ag-Cu-P/CP.

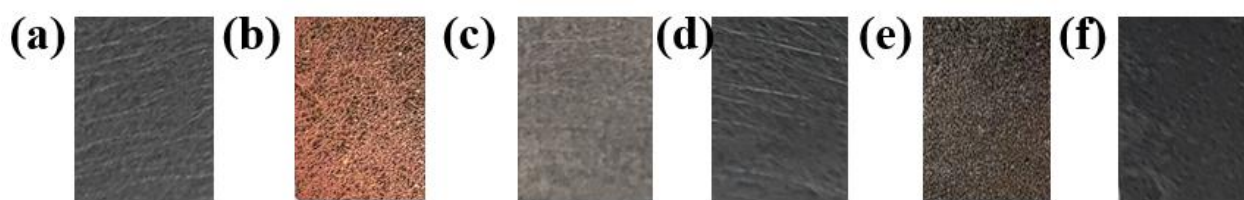

**Figure S2.** The digital pictures of blank carbon paper (a), Cu coating/CP (b), Ag coating/CP (c), nano-Ag/CP (d), Ag-Cu/CP (e), and Ag-Cu-P/CP (f).

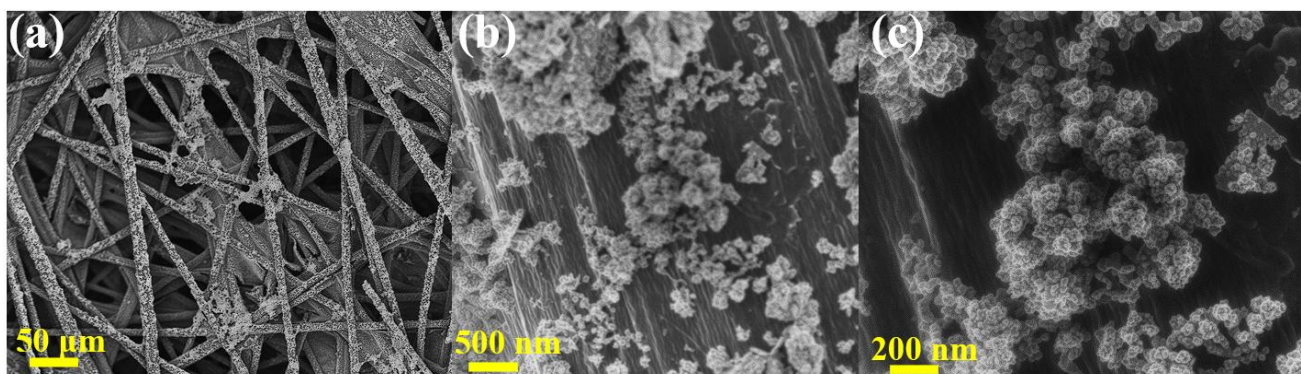

**Figure S3.** The SEM images of nano Ag/CP.

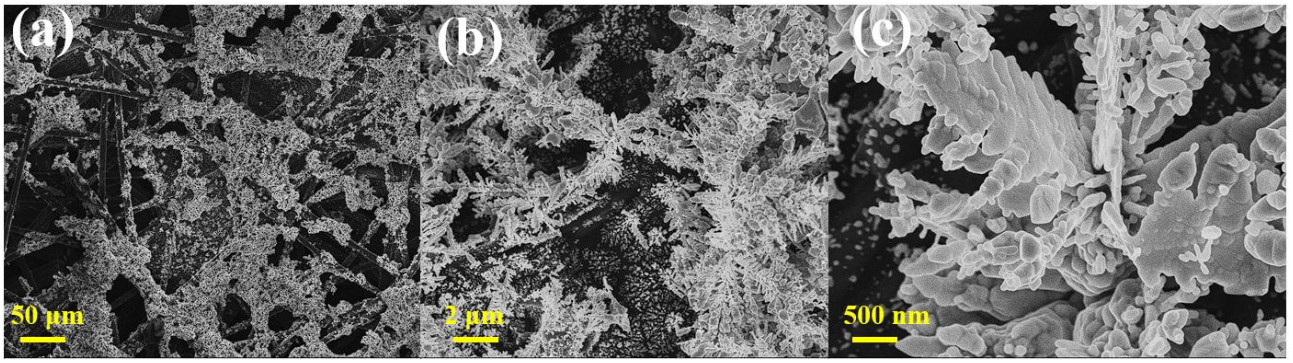

**Figure S4.** The SEM images of Ag coating/CP.

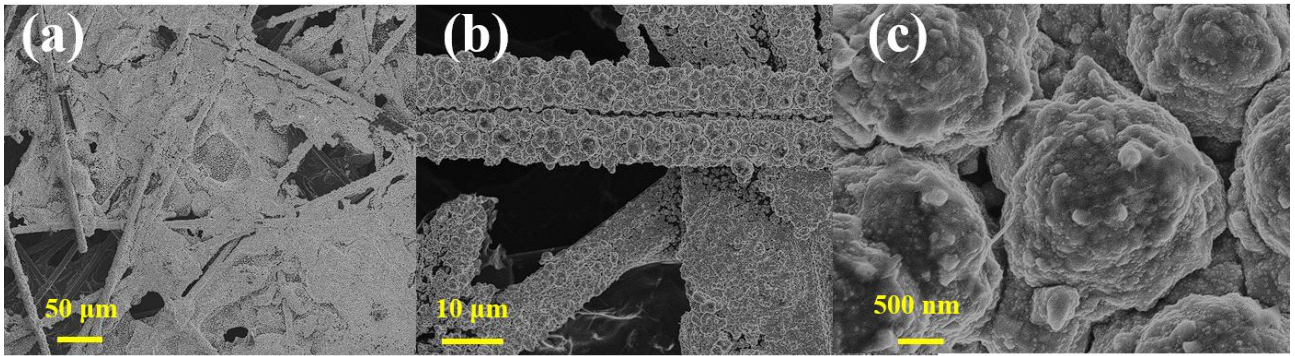

**Figure S5.** The SEM images of Cu coating/CP.

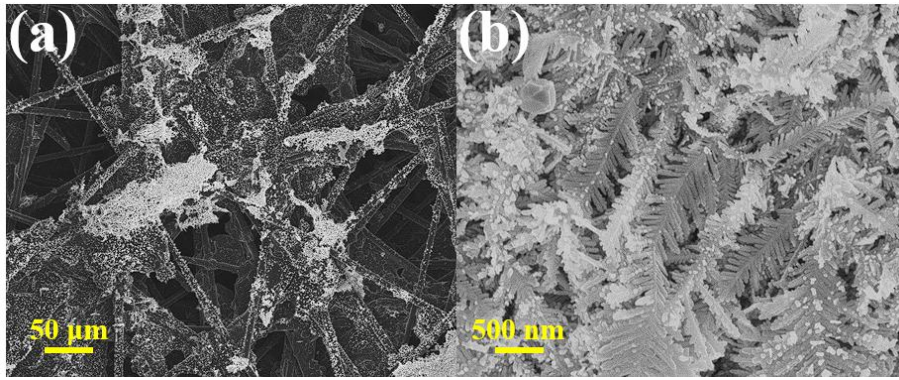

**Figure S6.** The SEM images of Ag-Cu/CP.

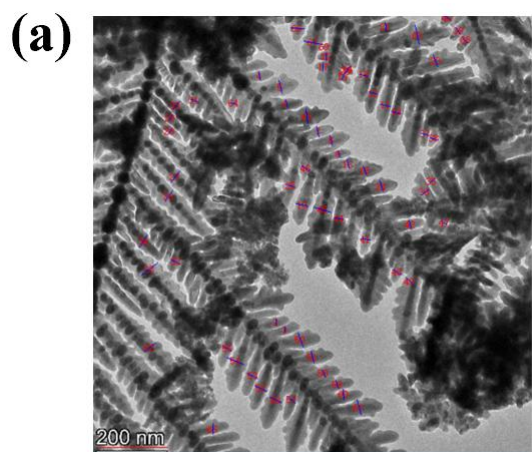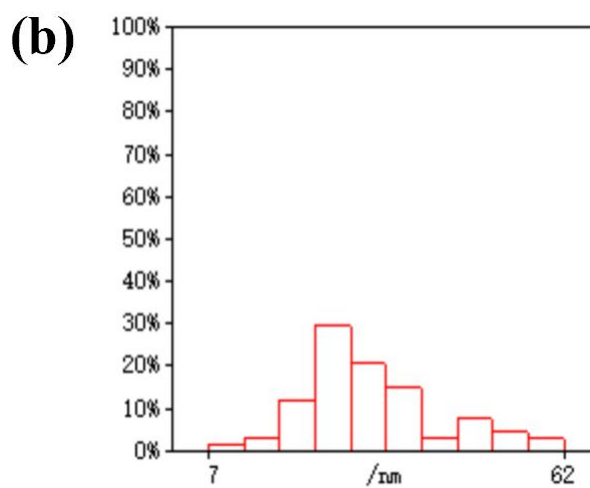

**Figure S7.** The particle size statistics of Ag-Cu-P.



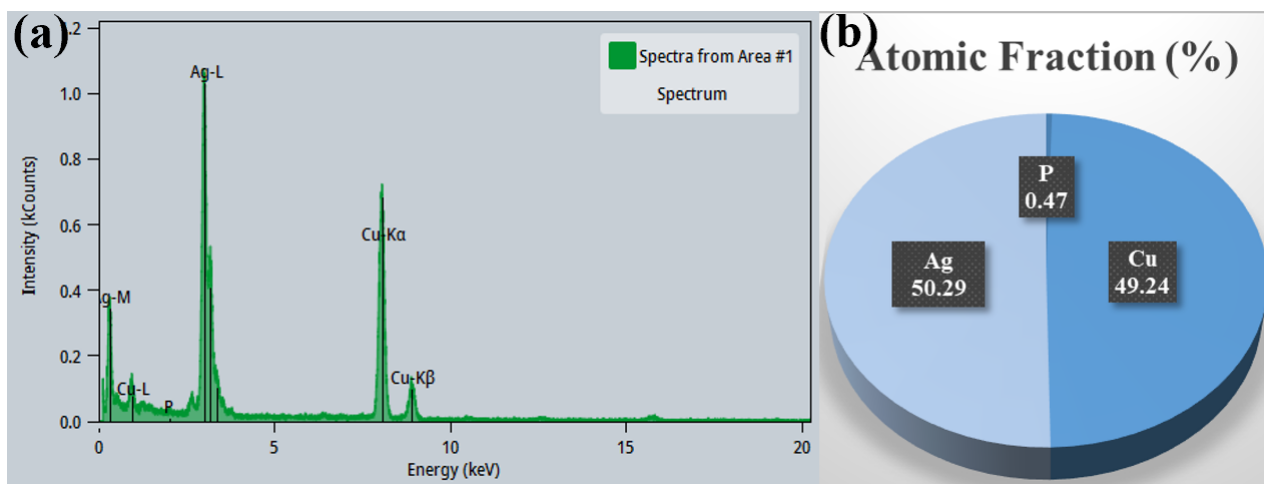

**Figure S8.** Elemental Scale Diagram of Ag-Cu-P (a), (b).

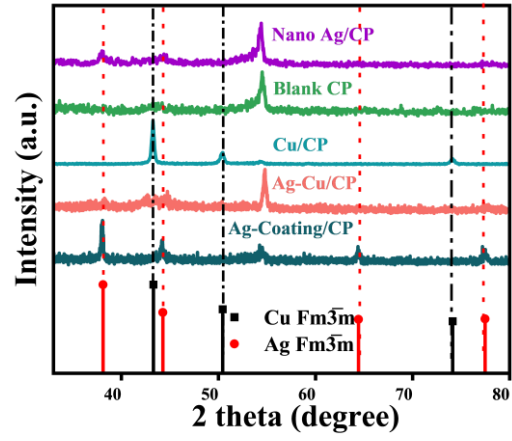

**Figure S9.** The XRD pattern of nano Ag/CP, blank carbon paper, Cu coating/CP, Ag-Cu/CP, and Ag coating/CP.

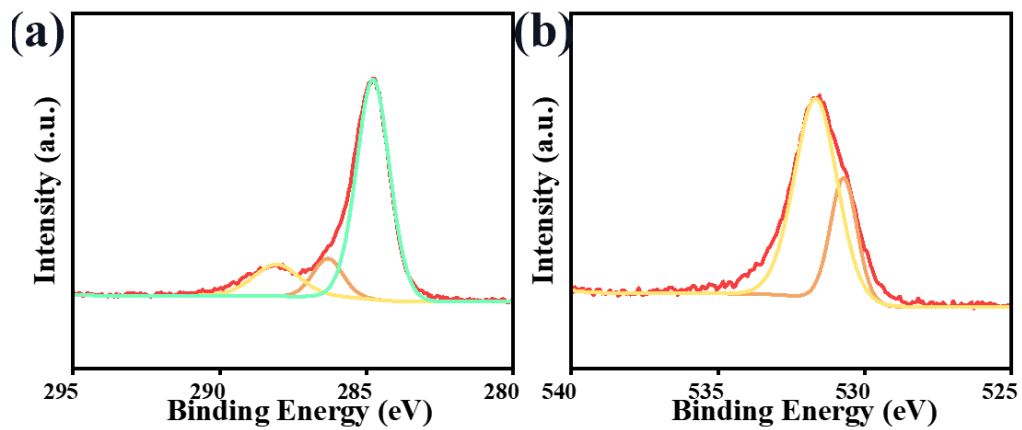

Figure S10. The O (a) and C (b) XPS spectra of Ag-Cu-P.

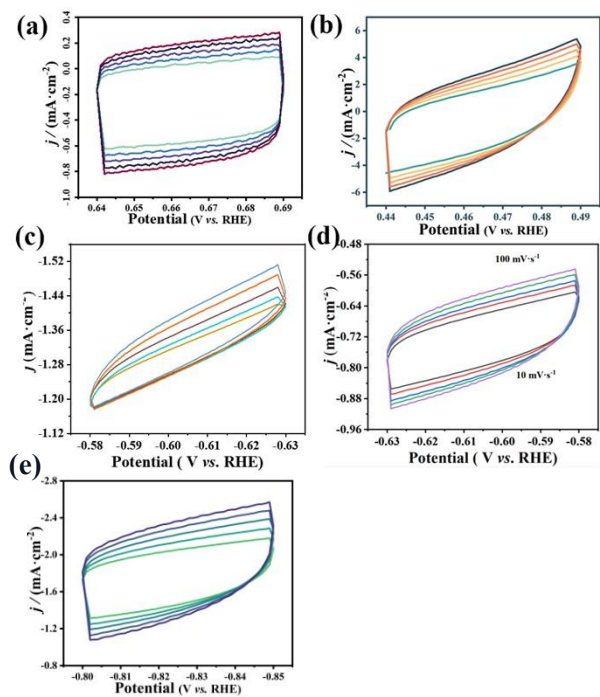

**Figure S11.** Typical CV curves of catalysts Ag coating/CP (a), Ag-Cu-P/CP (b), nano Ag/CP (c), blank CP (d), and Ag-Cu/CP.

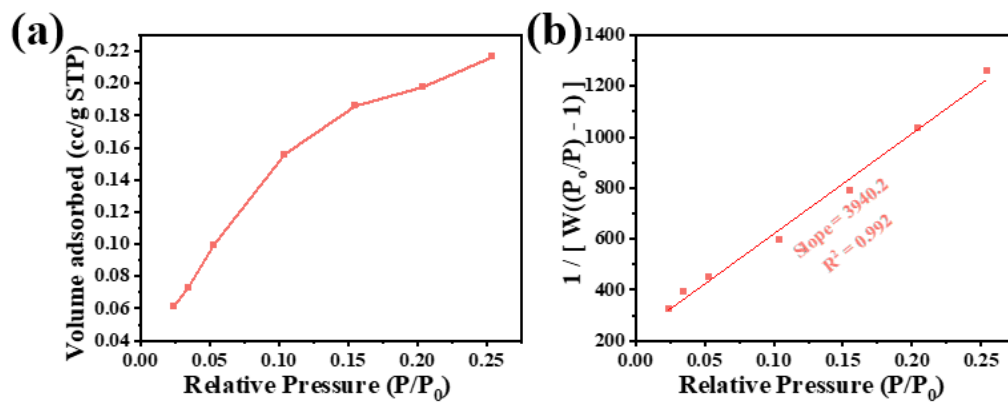

Figure 12. Isotherms (a) and fitting curves (b) of carbon paper

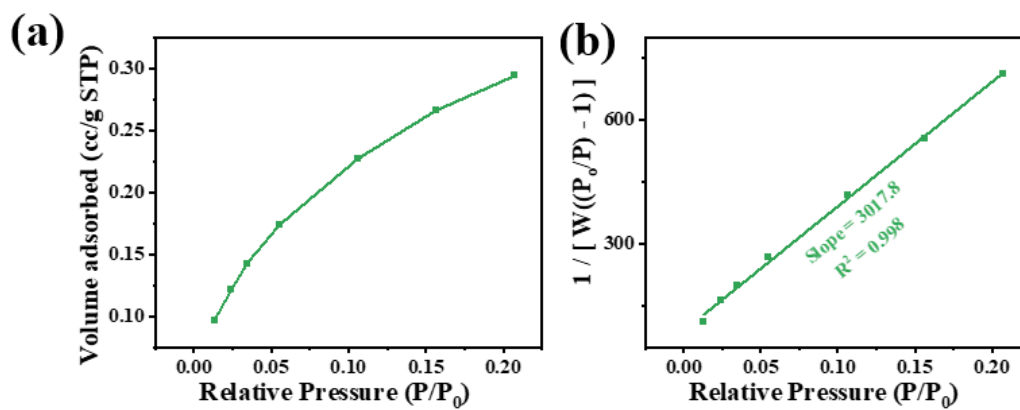

**Figure 13.** Isotherms (a) and fitting curves (b) of Ag-Cu-P/CP.

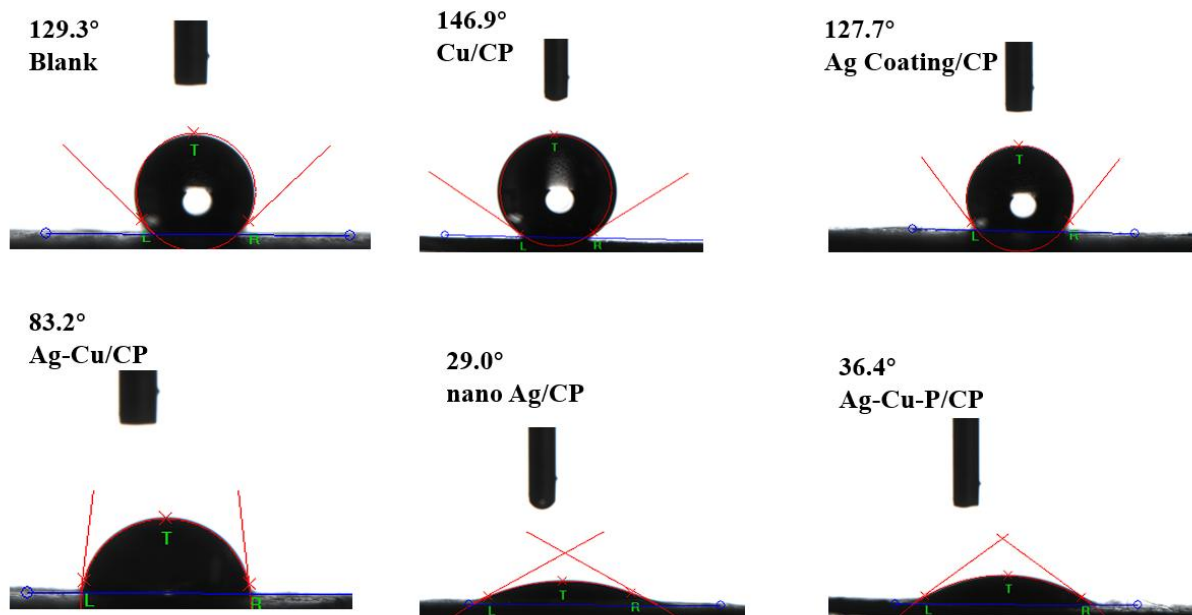

**Figure S14.** The Contact Angle Measurements on different catalyst's surface.

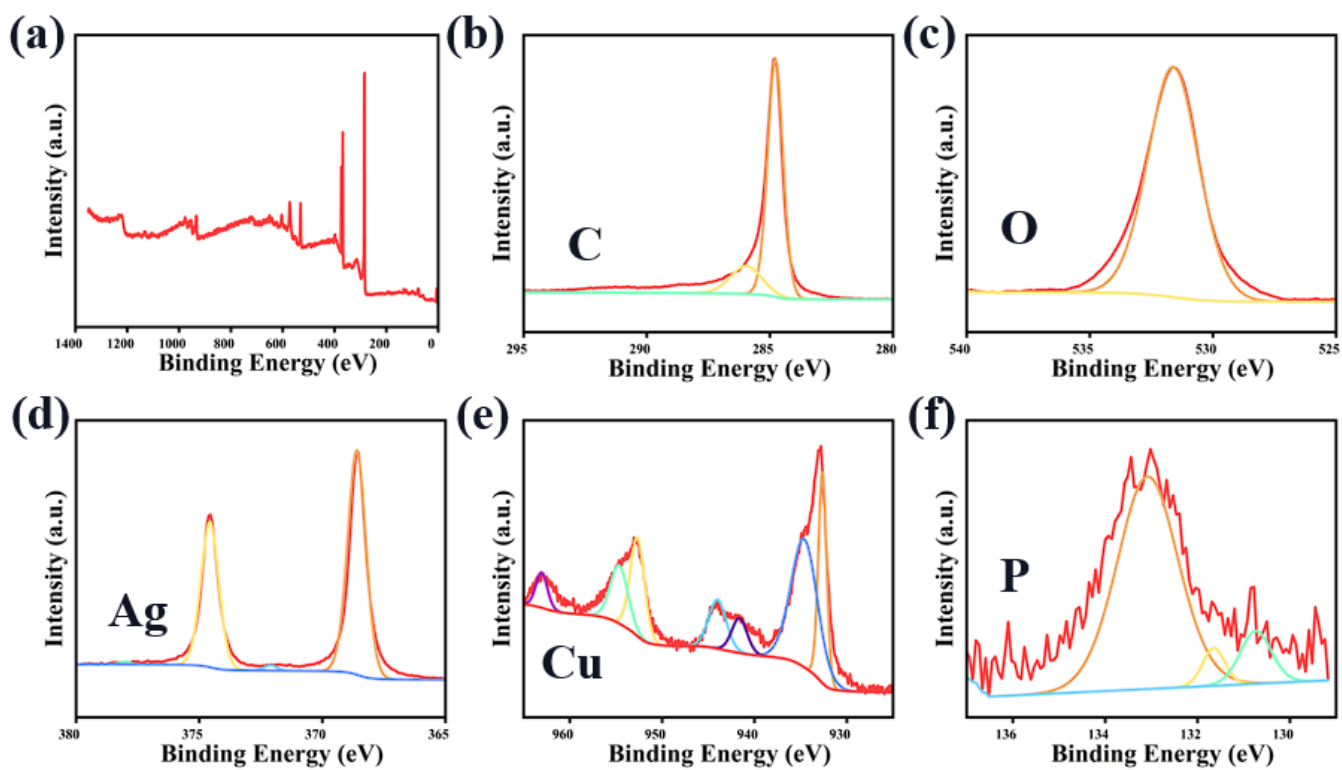

Figure S15. The XPS spectra of Ag-Cu-P (a), C 1s (b), O 1s (c), Ag 3d (d), Cu 2p (e), and P 3p (f) after stability test.



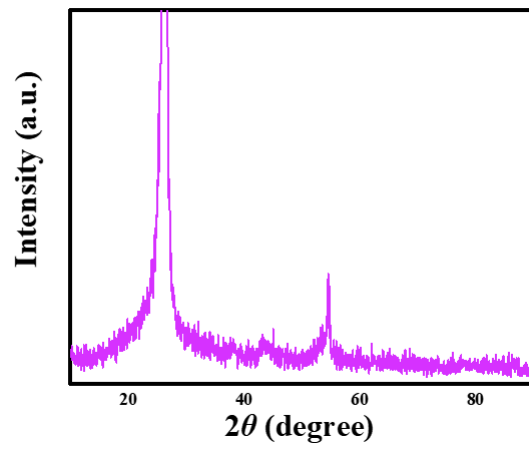

**Figure S16.** The XRD pattern of Ag-Cu-P after stability test.

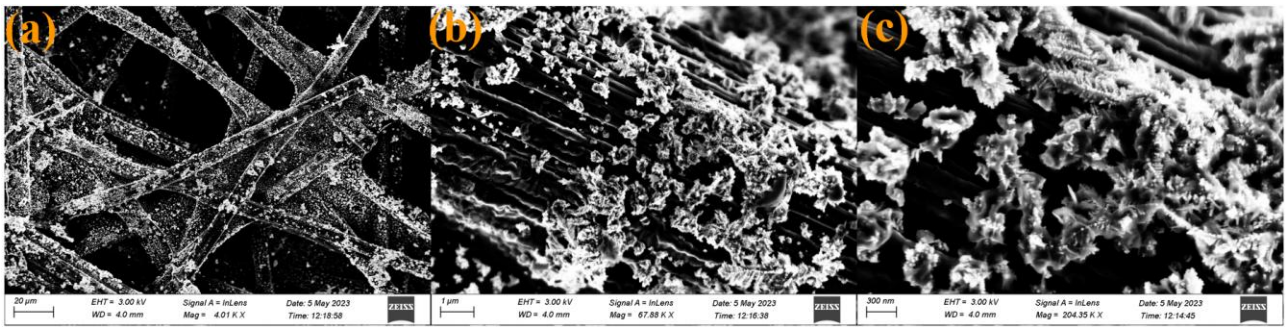

**Figure S17.** The SEM images of Ag-Cu-P/CP after the stability test.

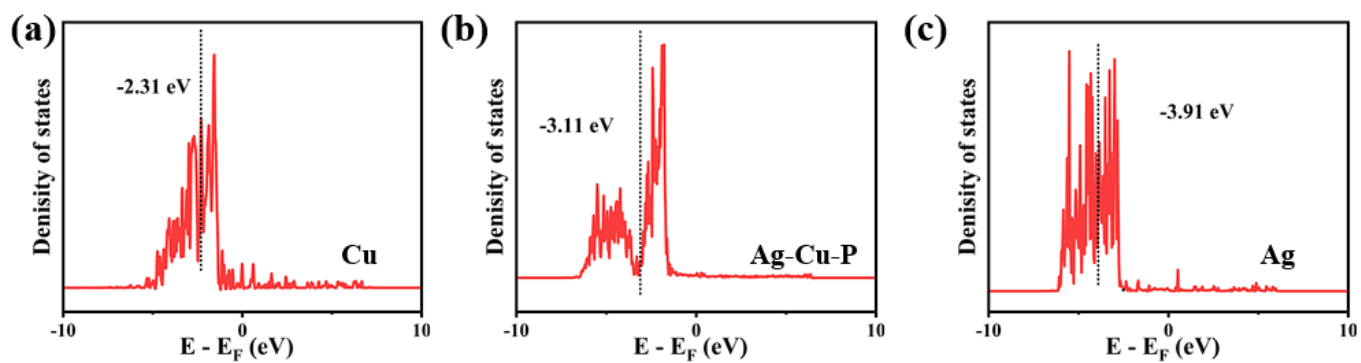

Figure S18. The PDOS plot of Cu, Ag-Cu-P, and Ag.

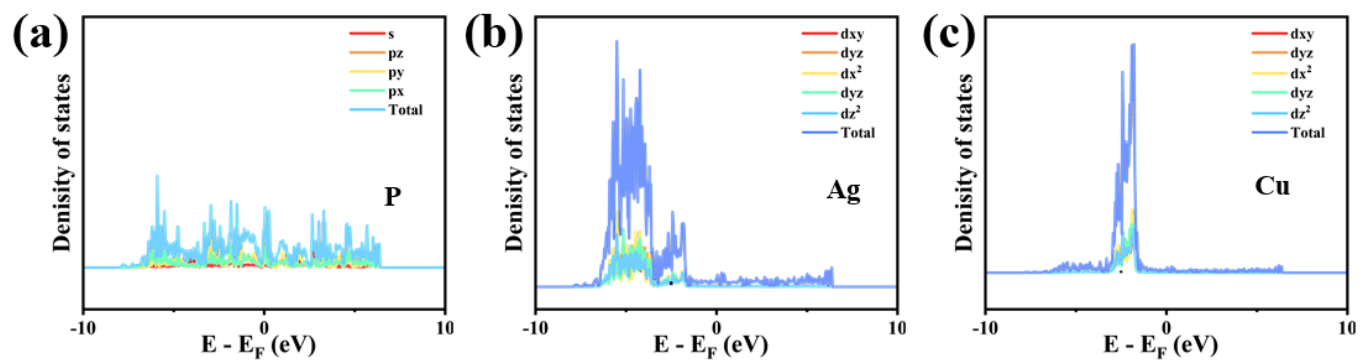

Figure S19. Calculated PDOS of Ag-Cu-P.

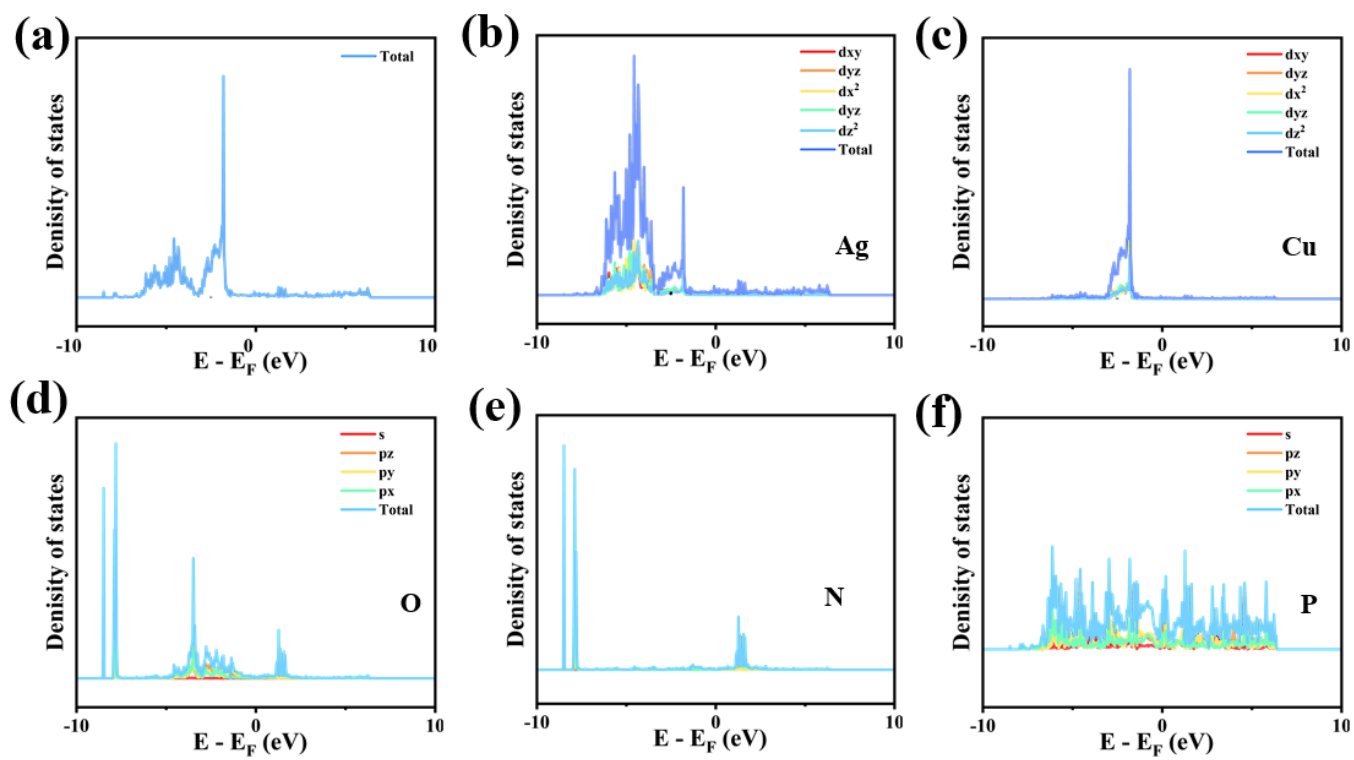

**Figure S20.** Calculated PDOS of  $^*NO_3$  on (111) surface of Ag-Cu-P.

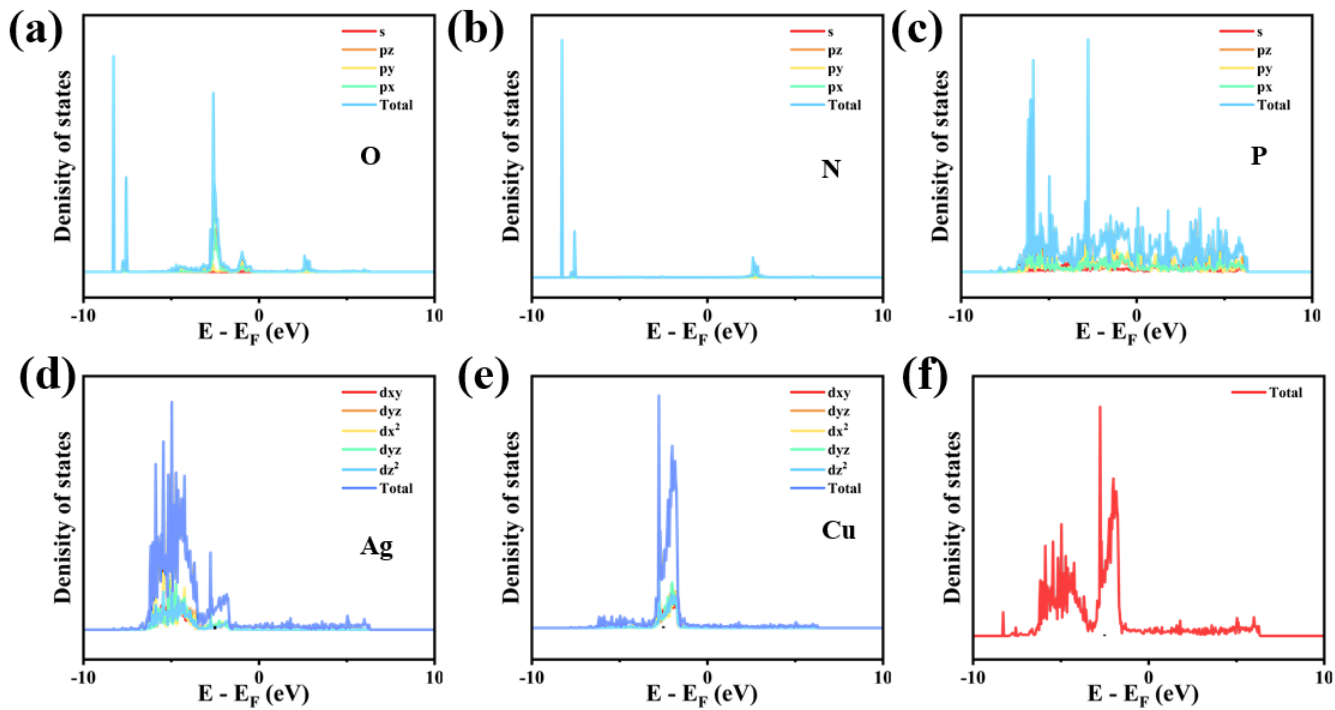

**Figure S21.** Calculated PDOS of  $^*NO_2$  on (111) surface of Ag-Cu-P.

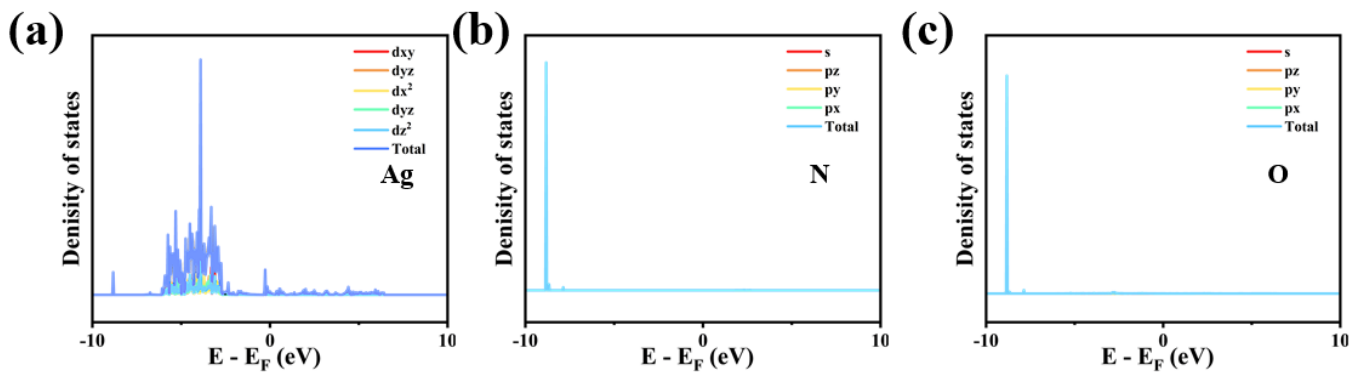

**Figure S22.** Calculated PDOS of \*NO<sub>3</sub> on (111) surface of Ag.

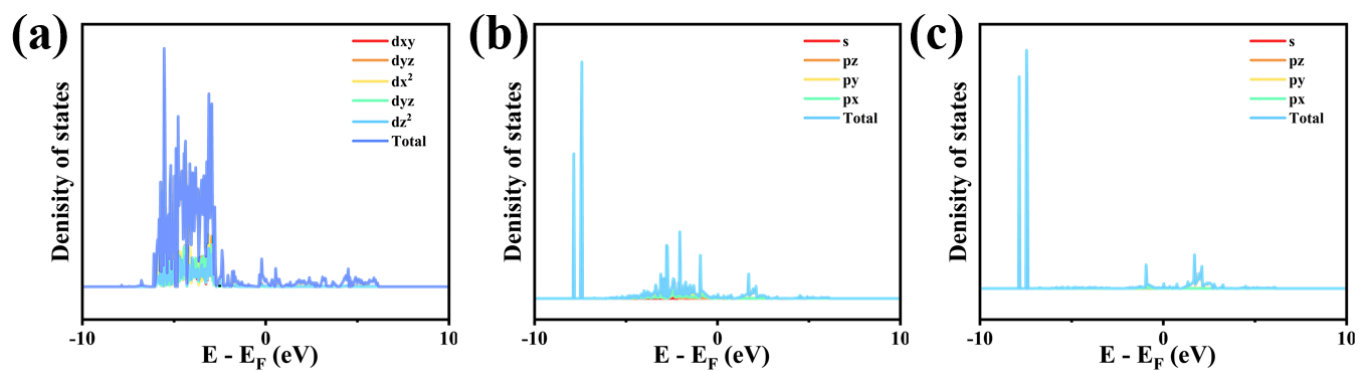

**Figure S23.** Calculated PDOS of  $^*NO_2$  on (111) surface of Ag.



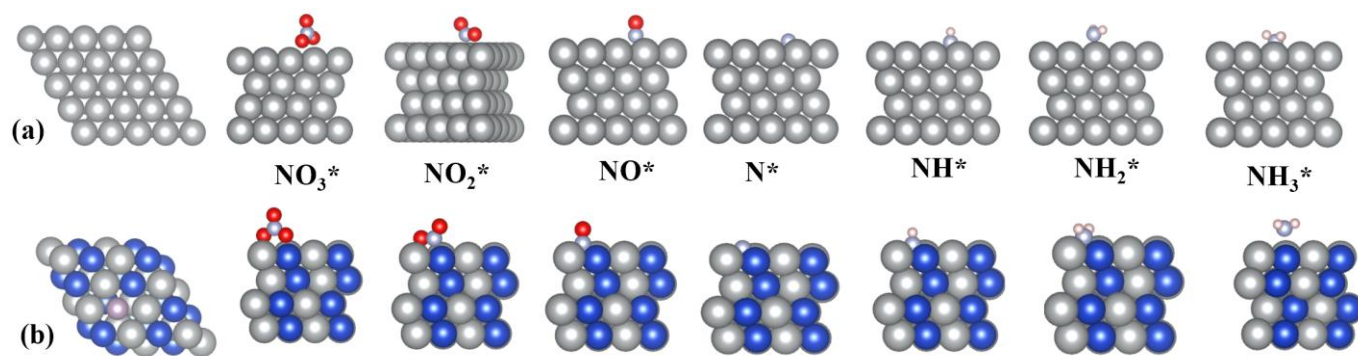

**Figure S24.** The adsorption configurations in the  $\text{NO}_3\text{RR}$  process of Ag (a) and Ag-Cu-P (b).

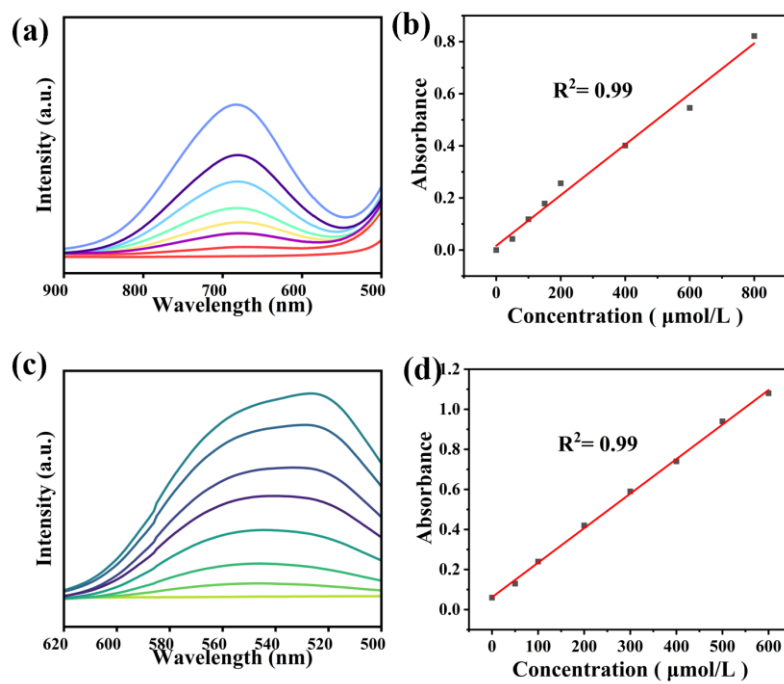

**Figure S25.** The UV-visible absorption spectra and corresponding fitting curves for various concentrations of  $\text{NH}_4^+$  (a), (b), and  $\text{NO}_2^-$  (c), (d).

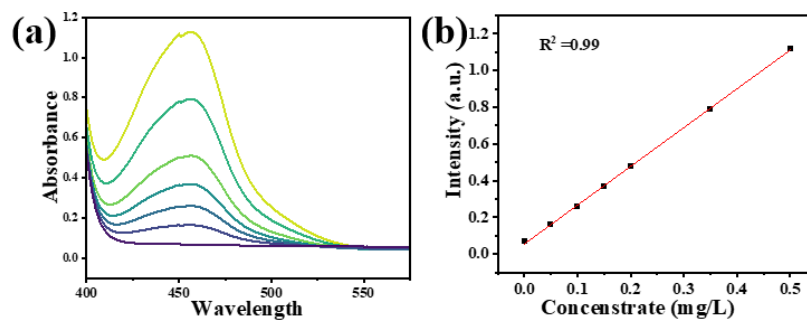

**Figure S26.** The UV-visible absorption spectra and corresponding fitting curves for various concentrations of  $N_2H_4$  (a), and (b).

**Table S1.** The elemental composition of Ag-Cu-P.

| Element | Family | Atomic Fraction (%) | Atomic Error (%) | Mass Fraction (%) | Mass Error (%) |
|---------|--------|---------------------|------------------|-------------------|----------------|
| P       | K      | 0.47                | 0.05             | 0.17              | 0.02           |
| Cu      | K      | 49.24               | 4.57             | 36.52             | 4.25           |
| Ag      | L      | 50.29               | 4.56             | 63.31             | 4.25           |

**Table S2. The  $C_{dl}$  and ECSA of different catalysts.**

| <b>Catalysts</b> | <b><math>C_{dl}</math> (mF)</b> | <b>ECSA (cm<sup>2</sup>)</b> |
|------------------|---------------------------------|------------------------------|
| Carbon Paper     | 0.28                            | /                            |
| Ag coating/CP    | 0.33                            | 8.25                         |
| nano Ag/CP       | 1.05                            | 26.25                        |
| Cu coating/CP    | 2.39                            | 59.75                        |
| Ag-Cu/CP         | 1.90                            | 47.50                        |
| Ag-Cu-P/CP       | 7.41                            | 185.25                       |

**Table S3.** BET analysis data for Ag-Cu-P/CC.

| Relative Pressure | Volume | $1 / [ W((P_0/P) - 1) ]$ | Summary                               |
|-------------------|--------|--------------------------|---------------------------------------|
| 1.31E-02          | 0.0967 | 1.10E+02                 |                                       |
| 2.42E-02          | 0.1215 | 1.64E+02                 |                                       |
| 3.43E-02          | 0.1427 | 1.99E+02                 | Slope = 3017.8 g <sup>-1</sup>        |
| 5.51E-02          | 0.1736 | 2.69E+02                 | Intercept = 89.6 g <sup>-1</sup>      |
| 1.06E-01          | 0.2274 | 4.18E+02                 | R <sup>2</sup> = 0.999                |
| 1.56E-01          | 0.2661 | 5.57E+02                 | Surface Area = 1.12 m <sup>2</sup> /g |
| 2.07E-01          | 0.2942 | 7.11E+02                 |                                       |

**Table S4.** BET analysis data for carbon paper

| Relative Pressure | Volume | $1 / [ W((P_0/P) - 1) ]$ | Relative Pressure                      |
|-------------------|--------|--------------------------|----------------------------------------|
| 2.40E-02          | 0.0611 | 3.22E+02                 |                                        |
| 3.47E-02          | 0.0732 | 3.92E+02                 |                                        |
| 5.29E-02          | 0.0995 | 4.50E+02                 | Slope = 3940.2 g <sup>-1</sup>         |
| 1.04E-01          | 0.156  | 5.96E+02                 | Intercept = 225.4 g <sup>-1</sup>      |
| 1.55E-01          | 0.186  | 7.89E+02                 | R <sup>2</sup> = 0.999                 |
| 2.04E-01          | 0.1978 | 1.04E+03                 | Surface Area = 0.836 m <sup>2</sup> /g |
| 2.54E-01          | 0.2165 | 1.26E+03                 |                                        |

**Table S5. The  $R_s$  and  $R_{ct}$  of different catalysts**

| Catalysts     | $R_s$ | $R_{ct}$ |
|---------------|-------|----------|
| Carbon Paper  | 4.3   | /        |
| Ag coating/CP | 2.2   | 19.3     |
| nano Ag/CP    | 2.3   | 9.6      |
| Cu coating/CP | 3.3   | 12.6     |
| Ag-Cu/CP      | 2.3   | 12.7     |
| Ag-Cu-P/CP    | 1.7   | 3.2      |



**Table S6. The potential at 10 mA/cm<sup>2</sup> of different catalysts in different reactions.**

| Catalysts     | NO <sub>3</sub> RR (mV) | NO <sub>2</sub> RR (mV) |
|---------------|-------------------------|-------------------------|
| Ag-Cu-P/CP    | 256                     | -9                      |
| nano Ag/CP    | 241                     | -139                    |
| Ag-Cu/CP      | 231                     | -184                    |
| Ag coating/CP | 228                     | -239                    |
| Cu coating/CP | 102                     | -176                    |

**Table S7.** Calculated Gibbs free energies of Ag at different pH.

| $\Delta G$   | pH=14    | pH=7     | pH=0     |
|--------------|----------|----------|----------|
| $\Delta G_0$ | 0        | 0        | 0        |
| $\Delta G_1$ | -0.19441 | -0.19441 | -0.19441 |
| $\Delta G_2$ | 0.10049  | -0.72751 | -1.55551 |
| $\Delta G_3$ | 0.94112  | 0.11312  | -0.71488 |
| $\Delta G_4$ | 1.54973  | 0.72173  | -0.10627 |
| $\Delta G_5$ | -0.60074 | -1.01474 | -1.42874 |
| $\Delta G_6$ | 0.05332  | -0.36068 | -0.77468 |
| $\Delta G_7$ | -0.41218 | -0.82618 | -1.24018 |
| $\Delta G_8$ | -0.38926 | -0.38926 | -0.38926 |

**Table S8.** Calculated Gibbs free energies of Ag-Cu-P at different pH.

| $\Delta G$   | pH=14    | pH=7     | pH=0     |
|--------------|----------|----------|----------|
| $\Delta G_0$ | 0        | 0        | 0        |
| $\Delta G_1$ | -0.50545 | -0.50545 | -0.50545 |
| $\Delta G_2$ | 0.02979  | -0.79821 | -1.62621 |
| $\Delta G_3$ | 0.49182  | -0.33618 | -1.16418 |
| $\Delta G_4$ | 0.8757   | 0.0477   | -0.7803  |
| $\Delta G_5$ | -0.26603 | -0.68003 | -1.09403 |
| $\Delta G_6$ | 0.4082   | -0.0058  | -0.4198  |
| $\Delta G_7$ | 0.3754   | -0.0386  | -0.4526  |
| $\Delta G_8$ | -0.36136 | -0.36136 | -0.36136 |

**Table S9.** The performance comparison of different electrocatalysts in alkaline electrolytes.

| Catalyst                                 | Electrolyte                                                                  | Faraday efficiency (%) | Yield rate ( $\mu\text{mol h/cm}^2$ ) | reference |
|------------------------------------------|------------------------------------------------------------------------------|------------------------|---------------------------------------|-----------|
| Cu/Cu <sub>2</sub> O nanowire            | 200 ppm+0.5 M Na <sub>2</sub> SO <sub>4</sub>                                | 81.2                   | 244.9                                 | 1         |
| NiCo <sub>2</sub> O <sub>4</sub> /CP     | 0.1 M NaOH+0.1 M KNO <sub>3</sub>                                            | 95.2                   | 57.24                                 | 2         |
| MP-Cu                                    | 1 M KOH+0.05 M NO <sub>3</sub> <sup>-</sup>                                  | 97.80                  | 543                                   | 3         |
| Cu <sub>50</sub> Ni <sub>50</sub> alloy  | 1 M KOH+0.1 M KNO <sub>3</sub>                                               | 93                     | 416                                   | 4         |
| Cu/TiO <sub>2</sub> <sup>-</sup>         | 200 ppm NO <sub>3</sub> <sup>-</sup>                                         | 81.34                  | 114.3                                 | 5         |
| Fe SA                                    | 0.1 M K <sub>2</sub> SO <sub>4</sub> +0.5 M KNO <sub>3</sub>                 | 0.75                   | 460                                   | 6         |
| BCN@Cu                                   | 0.1 M KOH +100 mM KNO <sub>3</sub>                                           | 89.3                   | 348.48                                | 7         |
| Fe/Ni <sub>2</sub> P                     | 0.2 M K <sub>2</sub> SO <sub>4</sub> +50 mM KNO <sub>3</sub>                 | 94.3                   | 245                                   | 8         |
| CoO <sub>x</sub>                         | 1 M NaOH +0.1 M NaNO <sub>3</sub>                                            | 93.4                   | 172.4                                 | 9         |
| Co-SACs                                  | 1 M NaNO <sub>3</sub> +1 M NaOH                                              | 92                     | 30.92                                 | 10        |
| Pt <sub>0.9</sub> /Ce <sub>0.5</sub> -SS | 0.1 M KNO <sub>3</sub> +0.5 M Na <sub>2</sub> SO <sub>4</sub>                | 94.12                  | 599                                   | 11        |
| Co/CoONSAs                               | 14.33 mM NO <sub>3</sub> <sup>-</sup> +0.1 M Na <sub>2</sub> SO <sub>4</sub> | 93.8                   | 190                                   | 12        |
| Fe single atom                           | 0.5 M KNO <sub>3</sub> +0.1 M K <sub>2</sub> SO <sub>4</sub>                 | 75                     | 460                                   | 13        |
| Cu-PTCDA                                 | 36 mM KNO <sub>3</sub> +0.1 M PBS                                            | 85.9                   | 51.5                                  | 14        |
| Ag-Cu-P                                  | 0.1 M KNO <sub>3</sub> + 1 MKOH                                              | 93.7                   | 566.30                                | This work |

## Reference

- (1) Wang, Y.; Zhou, W.; Jia, R.; Yu, Y.; Zhang, B. Unveiling the Activity Origin of a Copper-Based Electrocatalyst for Selective Nitrate Reduction to Ammonia. *Angew. Chem.-Int. Ed.* **2020**, *59* (13), 5350–5354. <https://doi.org/10.1002/anie.201915992>.
- (2) Liu, Q.; Xie, L.; Liang, J.; Ren, Y.; Wang, Y.; Zhang, L.; Yue, L.; Li, T.; Luo, Y.; Li, N.; Tang, B.; Liu, Y.; Gao, S.; Alshehri, A. A.; Shakir, I.; Agboola, P. O.; Kong, Q.; Wang, Q.; Ma, D.; Sun, X. Ambient Ammonia Synthesis via Electrochemical Reduction of Nitrate Enabled by NiCo<sub>2</sub>O<sub>4</sub> Nanowire Array. *SMALL* **2022**, *18* (13). <https://doi.org/10.1002/sml.202106961>.
- (3) Wen, W.; Yan, P.; Sun, W.; Zhou, Y.; Yu, X.-Y. Metastable Phase Cu with Optimized Local Electronic State for Efficient Electrocatalytic Production of Ammonia from Nitrate. *Adv. Funct. Mater.* **2023**, *33* (6). <https://doi.org/10.1002/adfm.202212236>.
- (4) Wang, Y.; Xu, A.; Wang, Z.; Huang, L.; Li, J.; Li, F.; Wicks, J.; Luo, M.; Nam, D.-H.; Tan, C.-S.; Ding, Y.; Wu, J.; Lum, Y.; Cao-Thang Dinh; Sinton, D.; Zheng, G.; Sargent, E. H. Enhanced Nitrate-to-Ammonia Activity on Copper-Nickel Alloys via Tuning of Intermediate Adsorption. *J. Am. Chem. Soc.* **2020**, *142* (12), 5702–5708. <https://doi.org/10.1021/jacs.9b13347>.
- (5) Zhang, X.; Wang, C.; Guo, Y.; Zhang, B.; Wang, Y.; Yu, Y. Cu Clusters/TiO<sub>2-x</sub> with Abundant Oxygen Vacancies for Enhanced Electrocatalytic Nitrate Reduction to Ammonia. *J. Mater. Chem. A* **2022**, *10* (12), 6448–6453. <https://doi.org/10.1039/d2ta00661h>.
- (6) Wu, Z.-Y.; Karamad, M.; Yong, X.; Huang, Q.; Cullen, D. A.; Zhu, P.; Xia, C.; Xiao, Q.; Shakouri, M.; Chen, F.-Y.; (Timothy) Kim, J. Y.; Xia, Y.; Heck, K.; Hu, Y.; Wong, M. S.; Li, Q.; Gates, I.; Siahrostami, S.; Wang, H. Electrochemical Ammonia Synthesis via Nitrate Reduction on Fe Single Atom Catalyst. *Nat. Commun.* **2021**, *12* (1). <https://doi.org/10.1038/s41467-021-23115-x>.
- (7) Zhao, X.; Hu, G.; Tan, F.; Zhang, S.; Wang, X.; Hu, X.; Kuklin, A. V.; Baryshnikov, G. V.; Agren, H.; Zhou, X.; Zhang, H. Copper Confined in Vesicle-like BCN Cavities Promotes Electrochemical Reduction of Nitrate to Ammonia in Water. *J. Mater. Chem. A* **2021**, *9* (41), 23675–23686. <https://doi.org/10.1039/d1ta05718a>.
- (8) Zhang, R.; Guo, Y.; Zhang, S.; Chen, D.; Zhao, Y.; Huang, Z.; Ma, L.; Li, P.; Yang, Q.; Liang, G.; Zhi, C. Efficient Ammonia Electrosynthesis and Energy Conversion through a Zn-Nitrate Battery by Iron Doping Engineered Nickel Phosphide Catalyst. *Adv. ENERGY Mater.* **2022**, *12* (13). <https://doi.org/10.1002/aenm.202103872>.
- (9) Wang, J.; Cai, C.; Wang, Y.; Yang, X.; Wu, D.; Zhu, Y.; Li, M.; Gu, M.; Shao, M. Electrocatalytic Reduction of Nitrate to Ammonia on Low-Cost Ultrathin CoO<sub>x</sub> Nanosheets. *ACS Catal.* **2021**, *11* (24), 15135–15140. <https://doi.org/10.1021/acscatal.1c03918>.
- (10) Li, J.; Li, M.; An, N.; Zhang, S.; Song, Q.; Yang, Y.; Li, J.; Liu, X. Boosted Ammonium Production by Single Cobalt Atom Catalysts with High Faradic Efficiencies. *Proc. Natl. Acad. Sci. U. S. A.* **2022**, *119* (29). <https://doi.org/10.1073/pnas.2123450119>.
- (11) Chen, D.; Zhang, S.; Yin, D.; Li, W.; Bu, X.; Quan, Q.; Lai, Z.; Wang, W.; Meng, Y.; Liu, C.; Yip, S.; Chen, F.-R.; Zhi, C.; Ho, J. C. Tailored P-Orbital Delocalization by Diatomic Pt-Ce Induced Interlayer Spacing Engineering for Highly-Efficient Ammonia Electrosynthesis. *Adv. Energy Mater.* **2023**, *13* (6), 2203201. <https://doi.org/10.1002/aenm.202203201>.
- (12) Yu, Y.; Wang, C.; Yu, Y.; Wang, Y.; Zhang, B. Promoting Selective Electroreduction of Nitrates to Ammonia over Electron-Deficient Co Modulated by Rectifying Schottky Contacts. *Sci. CHINA-Chem.* **2020**, *63* (10), 1469–1476. <https://doi.org/10.1007/s11426-020-9795-x>.
- (13) Zhang, S.; Wu, J.; Zheng, M.; Jin, X.; Shen, Z.; Li, Z.; Wang, Y.; Wang, Q.; Wang, X.; Wei, H.; Zhang, J.; Wang, P.; Zhang, S.; Yu, L.; Dong, L.; Zhu, Q.; Zhang, H.; Lu, J. Fe/Cu Diatomic Catalysts for Electrochemical Nitrate Reduction to Ammonia. *Nat. Commun.* **2023**, *14* (1), 3634–3634. <https://doi.org/10.1038/s41467-023-39366-9>.

- (14) Chen, G.-F.; Yuan, Y.; Jiang, H.; Ren, S.-Y.; Ding, L.-X.; Ma, L.; Wu, T.; Lu, J.; Wang, H. Electrochemical Reduction of Nitrate to Ammonia via Direct Eight-Electron Transfer Using a Copper-Molecular Solid Catalyst. *Nat. ENERGY* **2020**, *5* (8), 605–613. <https://doi.org/10.1038/s41560-020-0654-1>.
